# Supplementary material
Source: PubMed Central journal article supplement (PMC4423803)
Supplement: NIHMS678996-supplement-6.pdf [file NIHMS678996-supplement-6.pdf]

## **SUPPLEMENTAL INFORMATION**

### **EXPERIMENTAL PROCEDURES**

#### **Reagents**

Ultra-pure LPS, *E.coli* 0111:B4 was obtained from InvivoGen (CA, USA). Alexa594 conjugated LPS (LPS-Alexa594) from Invitrogen (Oregon, USA), IL-1 receptor antagonist (IL-1RA) (Kineret-Anakinra, Amgen, CA, USA), recombinant IL-1 $\alpha$  (rIL-1 $\alpha$ ) was purchased from eBioscience, CA, USA.

#### **Alveolar macrophage Isolation**

BAL cells were obtained by bronchoalveolar lavage. Briefly, BAL cells were collected from individual mice by inserting a cannula into the trachea, and three 0.5 ml washes of PBS were infused in and out of the airways. The cells were centrifuged, and re-suspended in complete RPMI (10% FBS). 1 h later medium was removed and cultured with new complete RPMI for overnight.

#### **Myeloperoxidase assay (MPO)**

Briefly, lungs were homogenized in 1 ml of 50 mM potassium phosphate, pH 6.0, with 5% hexadecyltrimethyl ammonium bromide (HTAB) and 5mM EDTA, and then centrifuged at 12,000g for 10 minutes. The supernatant was diluted 1/50 HTAB buffer, mixed with 0.4 g/L tetramethylbenzidine (TMB) substrate solution (eBioscience) and measured by spectrophotometry at 450nm (SpectraMax).

### **Detection of cytokines and chemokines**

The cytokine concentrations in the BALF, lung homogenates or culture supernatant were measured using ELISA kits for mouse IL-1 $\beta$ , IL-1 $\alpha$ , and TNF- $\alpha$  ELISA kit (eBioscience). KC, MIP-2 and RANTES in BALF and lung homogenate were detected by ELISA kit (R&D systems, MN, USA). The assays were performed as described in manufacturers' protocols.

### **Flow Cytometry**

BAL cells were collected from individual mice and probed with anti-F4/80 (clone BM8, eBioscience), annexin V and 7AAD (eBioscience) and the percentage of annexin V and 7AAD double-positive cells were determined for necrotic cells. For neutrophil staining, anti-Ly6G-FITC and CD11b-PerCp-Cy5.5 (eBioscience) was used. For lung single cell suspensions, the lungs were enzymatically digested with Liberase (0.2 mg/ml; Roche Diagnostics, IN, USA) and DNase I (0.1 mg/ml; Roche) in 2 ml of Hanks' balanced salt solution at 37°C for 30 min and filtering through a 70 mm cell strainer (BD Biosciences, CA, USA). Cells were stained with the following antibodies: CD16/32 (eBioscience), CD45.2-PECy5, CD31-APC, VE-Cadherin-PE, ICAM1-PE, and CD62E-PE (BioLegend, CA, USA). CD31 single positive cells were gated and VE-cadherin was analyzed by using a Cyan flow cytometer and analyzed by Summit V4.3 software package (both from BD Biosciences).

### **Vascular Permeability**

Lung permeability was determined by assessing tissue accrual of Evans blue, as previously described (Green et al., 1988). Briefly, animals were administered 25 mg/kg Evans blue (Sigma) by tail vein (i.v.) injection 2 h before lung harvest. Lungs were perfused with 5ml PBS, and homogenized in 1ml PBS then washed twice. Evans blue was extracted by 1ml of Formamide at 60 °C for 18 h. The supernatant was separated by centrifugation at 5000 x g for 30 min. Evans blue concentration was quantitated by a dual wavelength spectrophotometric method at absorbencies of 620 nm and 740 nm, as determined by the following formula: E620 (Evans blue) = E620 - (1.426 X E740 + 0.030).

### **Western blotting**

BAL fluid was pooled within experimental groups of mice and concentrated using by ultra-filter 10 kDa (Millipore, MA, USA) and whole cell lysate and supernatant from BMDMs stimulated with LPS and ATP. The samples were then subjected to SDS-PAGE and immunoblotting was performed with anti-IL-1 $\alpha$  antibody (ALF-161, Santa Cruz Biotechnologies, CA, USA), followed by HRP-conjugated, anti-hamster secondary Ab. Detection was conducted using West Dura substrate (Thermo Scientific, MA, USA).

### **Statistics**

Data are reported as mean values  $\pm$  SEM. Statistical significance was evaluated by Student's *t* test (two-tailed). In experiment where data was not normally distributed, the Mann-Whitney test was performed. For multiple comparison test, statistical significance

was evaluated by one or two-way ANOVA with Tukey's post-hoc test where appropriate.

A p value of less than 0.05 was required to reject the null hypothesis

# Supplemental Figures

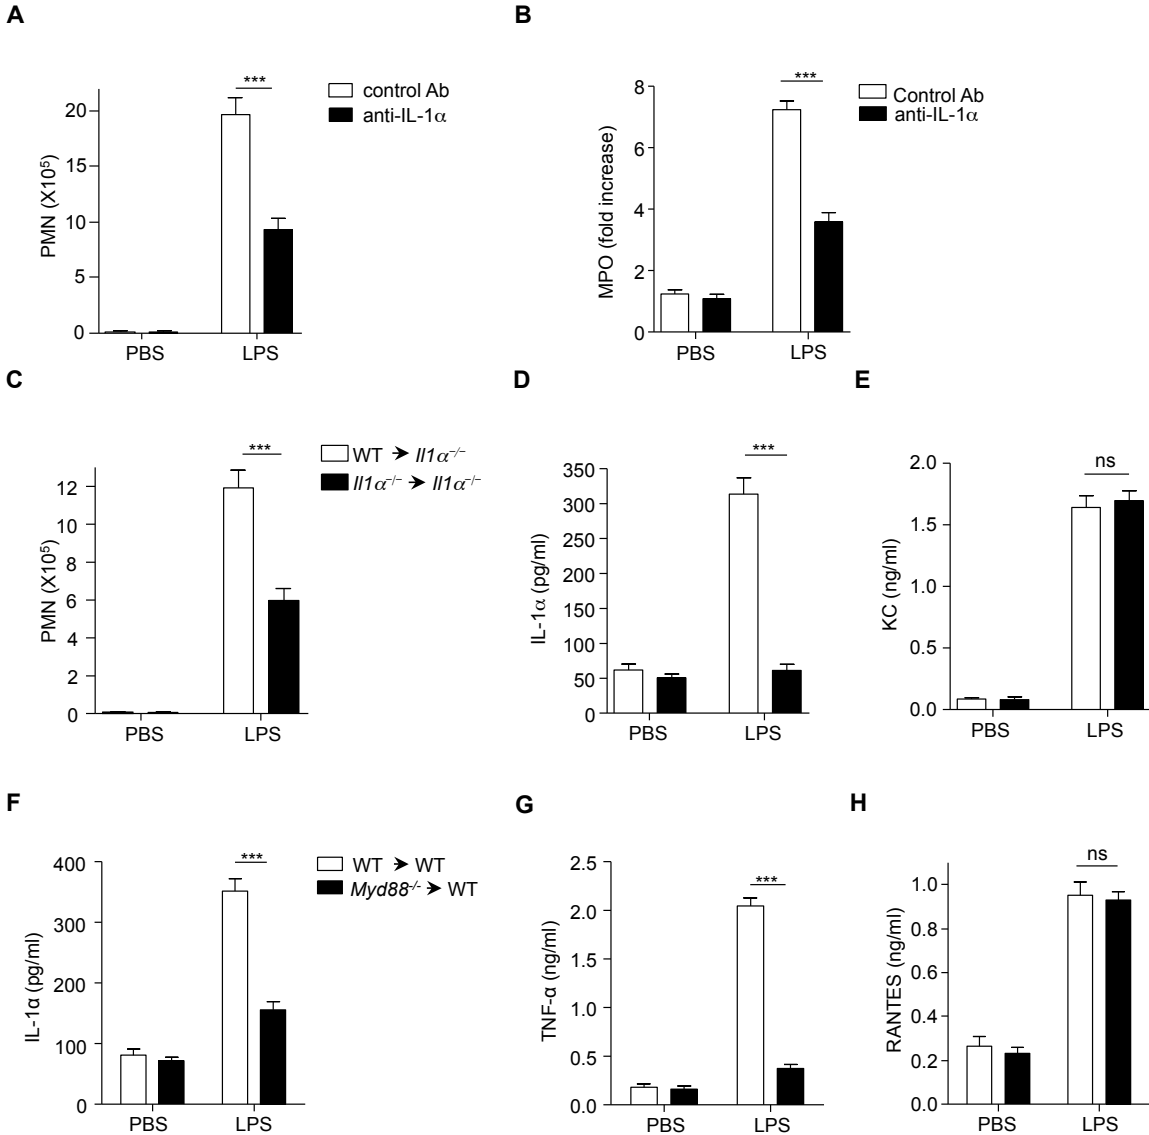

**Figure S1. Related to Figure 2. IL-1 $\alpha$  Is Crucial During LPS-Induced Acute Lung Injury**

(A and B) WT mice were (i.t.) administered control or IL-1 $\alpha$  neutralization antibody with PBS or LPS 6 h. (A) PMN numbers were counted in the BALF and (B) MPO activity was measured in the lung homogenate. (C-E) *Il1 $\alpha$ <sup>-/-</sup>* mice received bone marrow cells from WT or *Il1 $\alpha$ <sup>-/-</sup>* mice, and 12 weeks later mice were challenged (i.t.) with PBS or LPS 6 h. (C) PMN numbers were counted in the BALF, and (D) IL-1 $\alpha$  and (E) KC concentrations in the BALF were determined by ELISA. (F-H) WT mice received bone marrow cells from WT or *Myd88*<sup>-/-</sup> mice, and 12 weeks later mice were challenged (i.t.) with PBS or LPS 6 h. (F) IL-1 $\alpha$ , (G) TNF- $\alpha$ , and (H) RANTES concentrations in the BALF were determined by ELISA. Each group n=5. Results shown are representative of two experiments, mean  $\pm$  SD. \*\*\*p < 0.001.

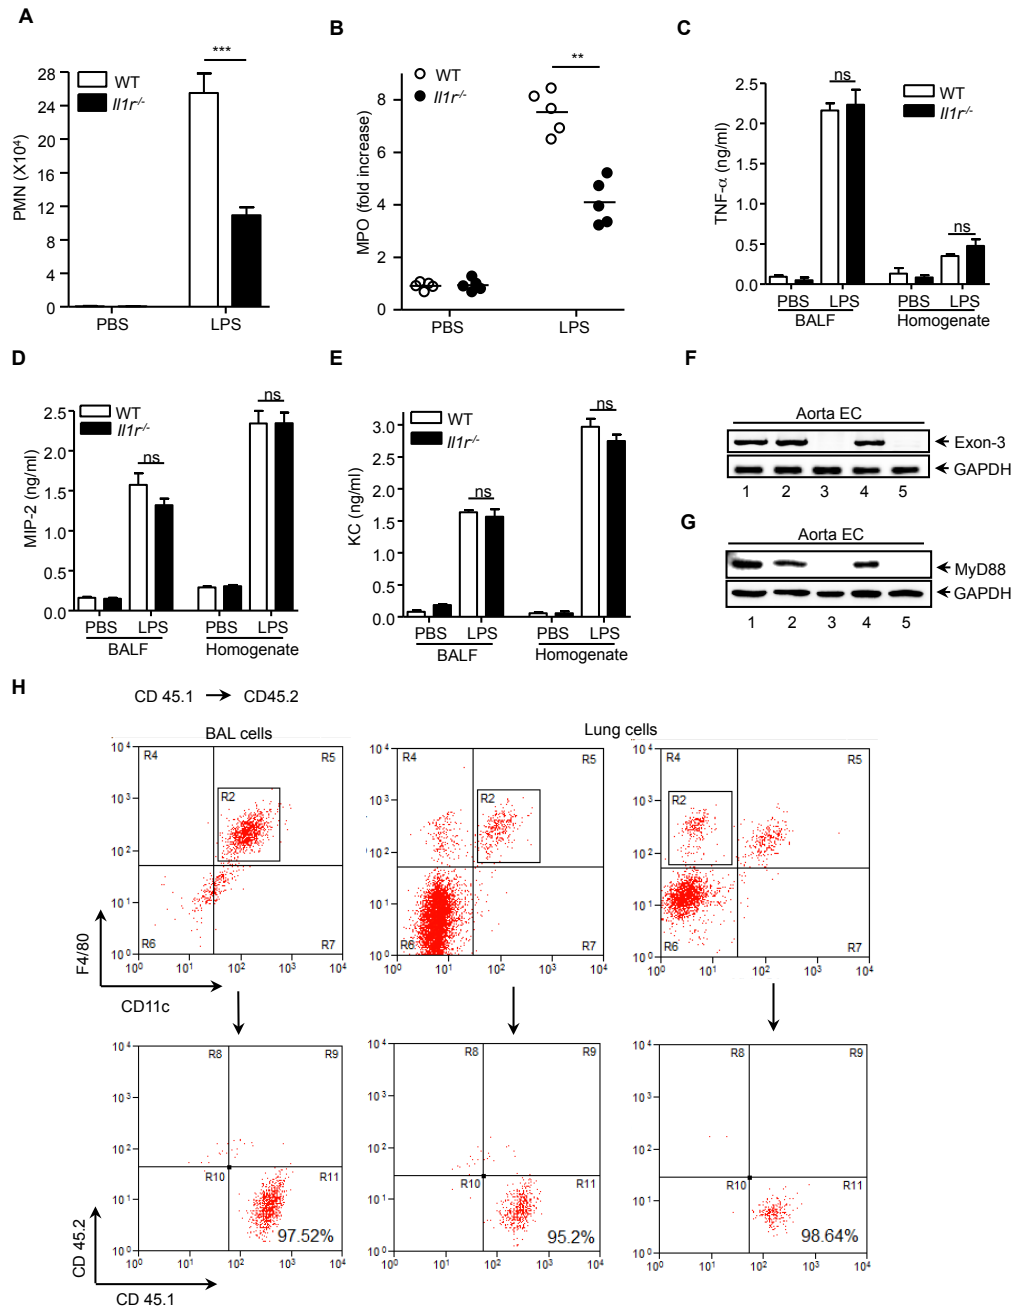

**Figure S2. Related to Figure 3. IL-1R-MyD88 Is Important for Neutrophil Recruitment**

(A-E) WT and *Il1r<sup>-/-</sup>* mice were challenged (i.t.) with PBS or LPS 6 h later. (A) PMN numbers were counted in the BALF and (B) MPO activity was measured in the lung homogenate. (C) TNF- $\alpha$ , (D) MIP-2, and (E) KC concentrations in BALF and lung homogenates were determined by using ELISA. (F) MyD88 exon-3 deletion and (G) MyD88 protein expression in aorta EC was measured by PCR and WB respectively. WT (lane 1), *Tie2-Cre* (lane 2), *Myd88<sup>-/-</sup>* (lane 3), *Myd88<sup>fl/fl</sup>* (lane 4) and *EC<sup>MyD88-/-</sup>* (lane 5). GAPDH was used as loading control. (H) C57BL/6 (CD45.2+) mice received bone marrow from Ly5.1 (CD45.1+) mice and 12 weeks later, BAL cells and lung single cell suspension was performed. F4/80 and CD11c double positive or F4/80 single positive cells were gated and bone marrow cells reconstitution was measured by flow cytometry. Each group n=5. Results shown are representative of two experiments, as mean  $\pm$  SD. \*\*p < 0.01, \*\*\*p < 0.001.

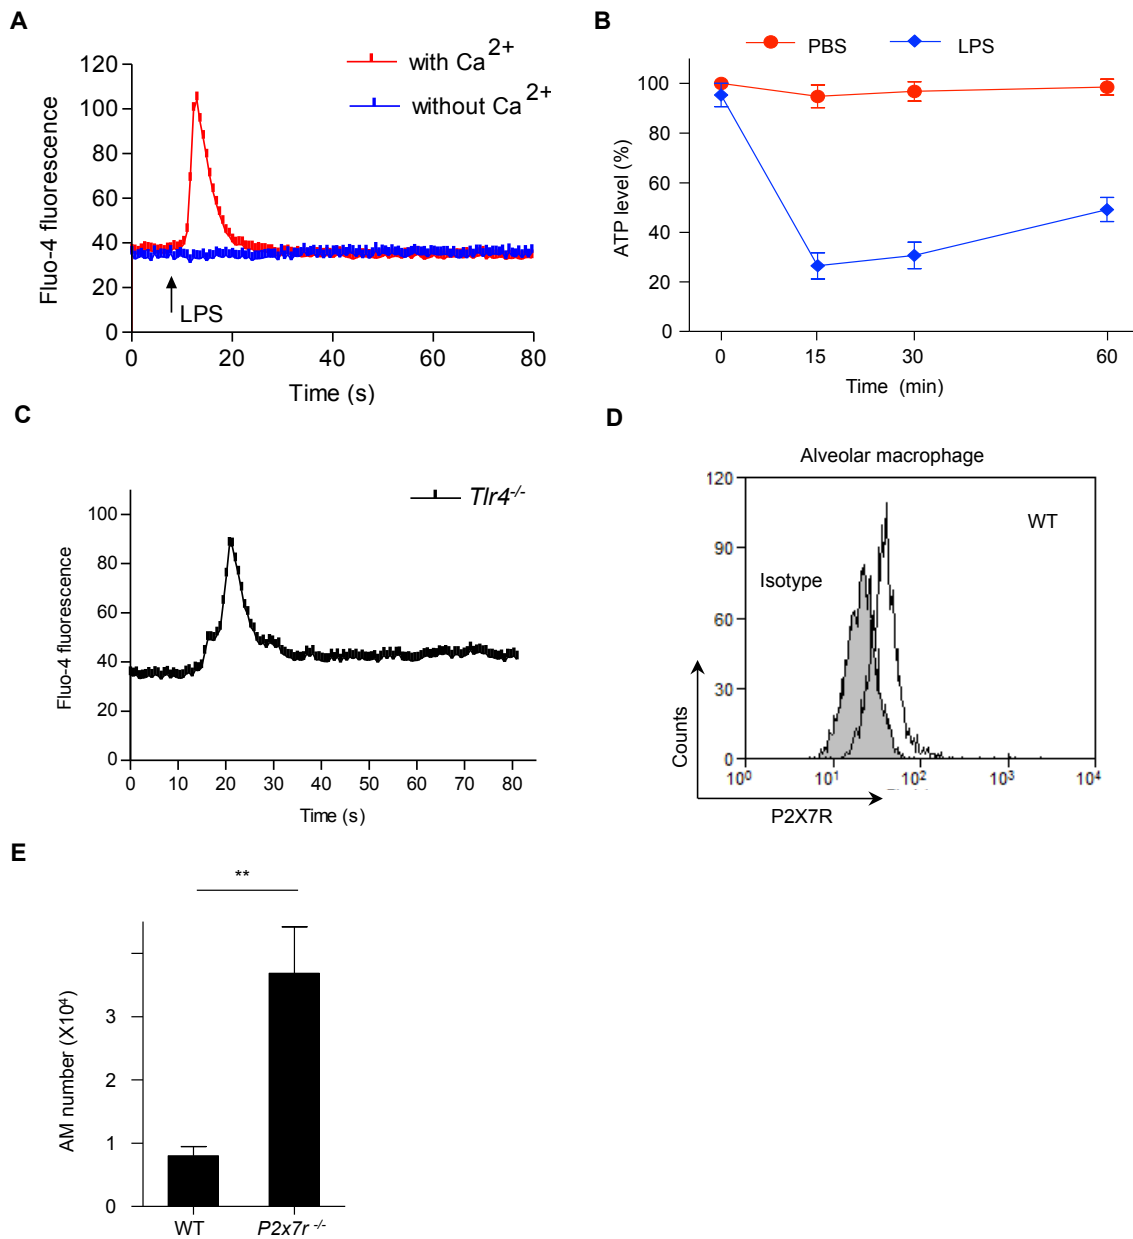

**Figure S3. Related to Figure 4. LPS Mediates Calcium Influx in Alveolar Macrophages Expressing the P2X7 Receptor**

(A) AM from WT mice were loaded with 4 mM of Fluo-4 for 30 min at room temperature and calcium mobility after LPS was measured by confocal microscopy. (B) WT mice were (i.t.) challenged with LPS at time 0 and ATP amounts were determined in AM by ATPlite detection assay. (C) AM from *Tlr4*<sup>-/-</sup> mice were loaded with 4 mM of Fluo-4 for 30 min and calcium mobility after LPS was measured by confocal microscopy. (D) BAL cells were isolated from WT mice (n=5). F4/80 and CD11c double positive cells (alveolar macrophage) were gated and P2X7R expression was measured by flow cytometry. (E) WT or *P2x7r*<sup>-/-</sup> mice were (i.t.) challenged with PBS or LPS 4 h and AM numbers counted in the BALF.

**A**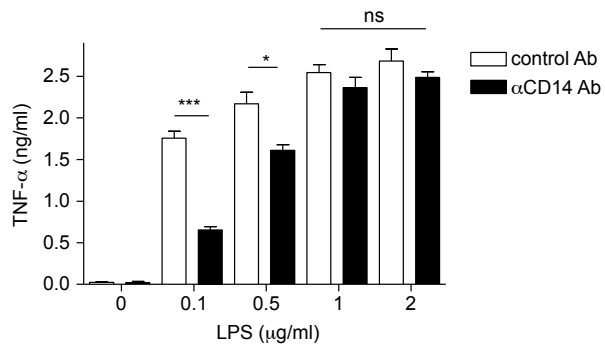**B**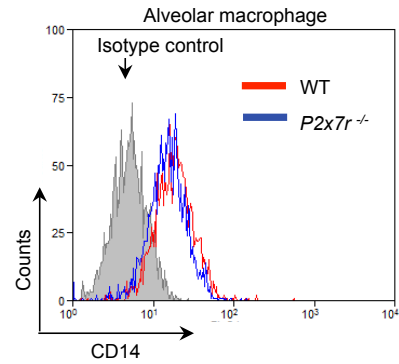

**Figure S4. Related to Figure 5. CD14 levels Are Similar on AM in WT and *P2x7r*<sup>-/-</sup> Mice**

(A) AM were isolated from WT mice and  $3 \times 10^4$  cells were plated in 96 wells. AM were pretreated with control or CD14 neutralization antibody (Ab) for 1 h, and stimulated with LPS at the indicated doses. TNF- $\alpha$  levels in supernatant were measured by ELISA after 4 h LPS stimulation. (B) BAL cells were isolated from WT or *P2x7r*<sup>-/-</sup> mice. F4/80 and CD11c double positive cells were gated and CD14 expression was measured by flow cytometry. Results shown are representative of two experiments, as mean  $\pm$  SD. \* $p < 0.1$ , \*\*\* $p < 0.001$ .



## **Supplemental Movie Legends**

### **Movie S1. Related to Figure 5. P2X7R is not sufficient for Ca<sup>2+</sup> Mobilization Induced by LPS**

P2X7R were loaded with Fluo-4 (4  $\mu$ M) for 30 min and calcium mobilization was measured by confocal microscopy upon LPS treatment.

### **Movie S2. Related to Figure 5. CD14 is not sufficient for Ca<sup>2+</sup> Mobilization Induced by LPS**

CD14 stably expressing HEK293 cells were loaded with Fluo-4 (4  $\mu$ M) for 30 min and calcium mobilization was measured by confocal microscopy upon LPS treatment.

### **Movie S3. Related to Figure 5. CD14 is required for P2X7R Dependent Ca<sup>2+</sup> Mobilization Induced by LPS**

P2X7R and CD14 stably expressing HEK293 cells were loaded with Fluo-4 (4  $\mu$ M) for 30 min and calcium mobilization was measured by confocal microscopy upon LPS treatment.

### **Movie S4. Related to Figure 5. ATP induces P2X7R Dependent Ca<sup>2+</sup> Mobilization (positive control).**

P2X7R and CD14 stably coexpressing HEK293 cells were loaded with Fluo-4 (4  $\mu$ M) for 30 min and calcium mobilization was measured by confocal microscopy upon ATP treatment.
